# Supplementary material for: CD200 Checkpoint Reversal: A Novel Approach to Immunotherapy
Source: Oxford University Press journal article supplement (doi:10.1158/1078-0432.ccr-19-2234), 2019-10-17
Supplement: 10780432ccr192234-sup-225268_2_supp_5834882_pzdfj7.docx [file 10780432ccr192234-sup-225268_2_supp_5834882_pzdfj7.docx]

**Supplementary Figure 1.** **Generation of Knockout Macrophages (Raw 264.7).**  (A) Monocyte cell line, raw 264.7, was used to knockout single CD200 receptors (CD2001KO, CD200AR2KO, CD200AR3KO or CD200AR4KO). (B) CD200R1KO line was used to derive CD200R1&AR2KO (CD200AR3&4 expressing) cells, then further used to derive CD200AR3 expressing cell line. (C) CD200AR2KO line was used to derive CD200AR2&3KO (CD200R1&AR4 expressing) cells, then used to derive CD200AR4 expressing cells. (D) CD200AR3KO cells were used to derived CD200R1&AR3KO (CD200AR2&4 expressing) cells, then further used to derive CD200AR2 expressing cells. (E) CD200AR4KO cells were used to derive CD200AR3&4KO (CD200R1&AR2 expressing) cells and (F) CD200AR4KO cells were used to make CD200R1&AR4KO (CD200AR2&3 expressing) cells. PCR validation of receptor knockouts for the development of (G) dual and (H) single activation receptor expressing cells.

**Supplementary figure 2.** **CD200R1 and PD-1 expression.**  CD14+ cells were pulsed with the CD200AR-L and analyzed for (a) CD45+CD14+ populations, gating on CD45+CD14hi population, histograms of non-pulsed (red) and pulsed cells (blue) analyzed for (b) CD200R1 and (c) PD-1 were overlaid. Plots are representative of n=3 donors.
